# Supplementary material
Source: PubMed Central journal article supplement (PMC14659)

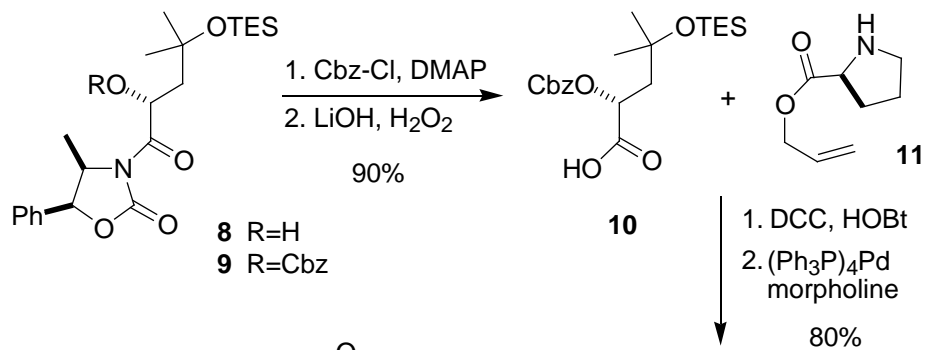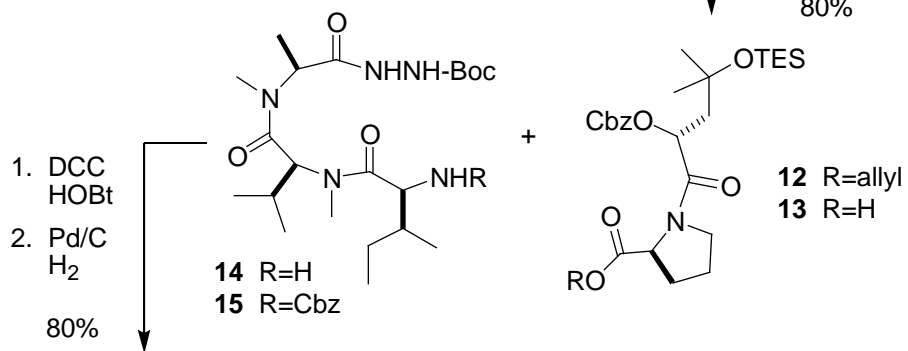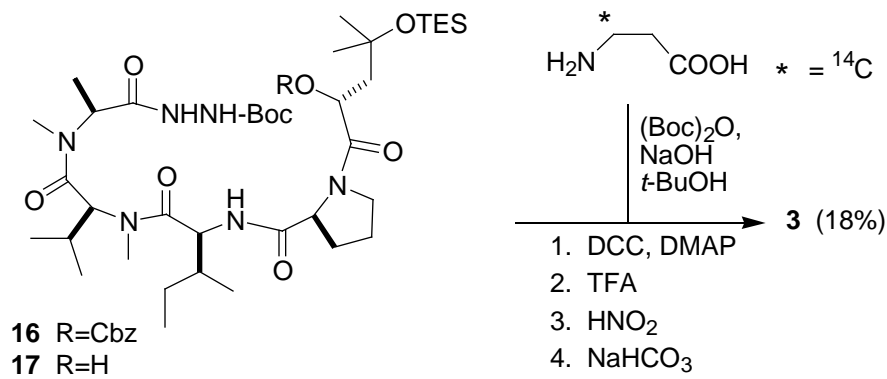

Supplement: pnas_021394998_2.pdf [file pnas_021394998_2.pdf]

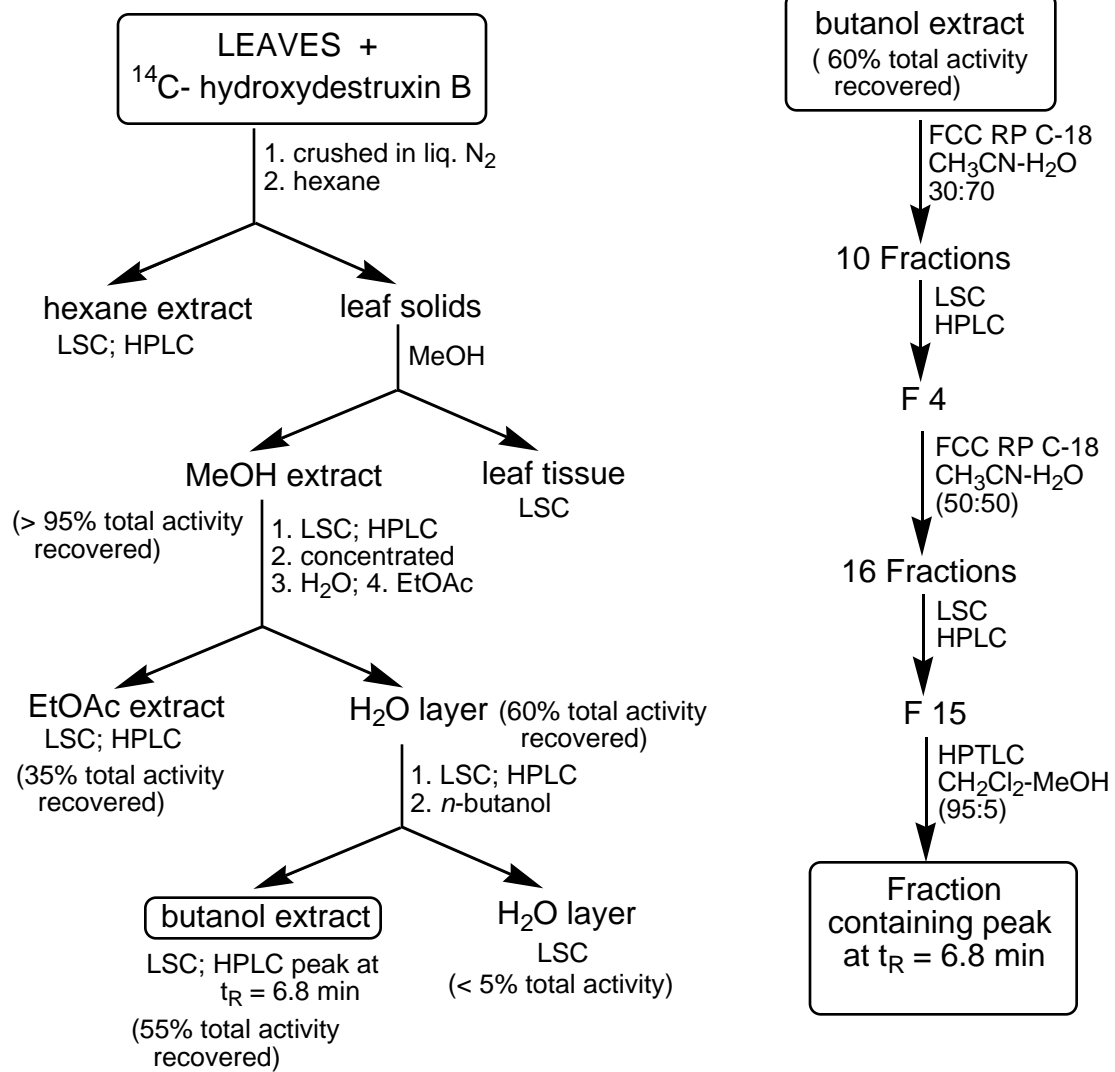

Supplement: pnas_021394998_4.pdf [file pnas_021394998_4.pdf]

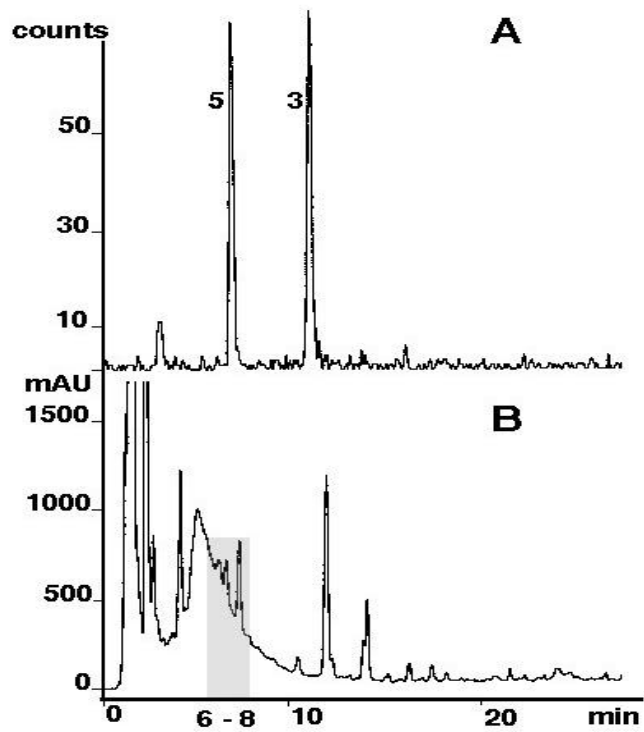

Supplement: pnas_021394998_6.pdf [file pnas_021394998_6.pdf]
